# Supplementary material for: Autoantibody Profiling in Plasma of Dengue Virus–Infected Individuals
Source: Pathogens. 2020 Dec 18;9(12):1060. doi: 10.3390/pathogens9121060 (PMC7766539; doi:10.3390/pathogens9121060)
Supplement: Supplementary file 1 [file pathogens-09-01060-s001.pdf]

**Supplementary figure S1. Analysis of autoantibody microarray data.** Representations are shown of heatmaps of IgM autoantibody (A) and IgG autoantibody (B). Plasma samples from 34 DENV-infected individuals including ASD (n=11), DF (n=13) and DHF (8) and HD (n=8) were used to probe autoantigen microarrays featuring 123 purified or recombinant autoantigens.

**A**

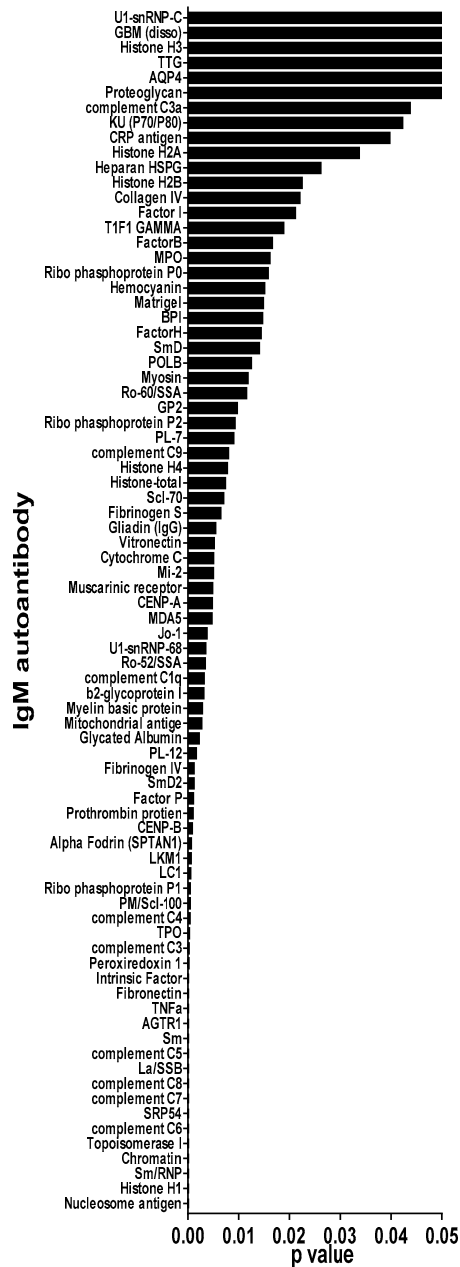

**B**

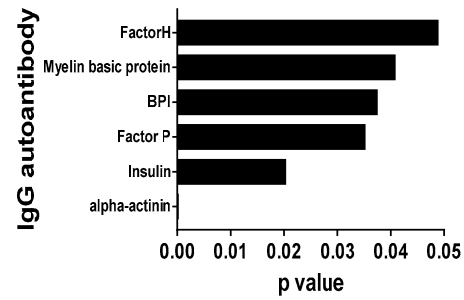

1

2

3

**Supplementary figure S2.** The graphs show the p-values in the multiple t-test comparisons of IgM (A) or IgG (B) autoantibodies in healthy controls compared with those in DENV-infected individuals.

**A**

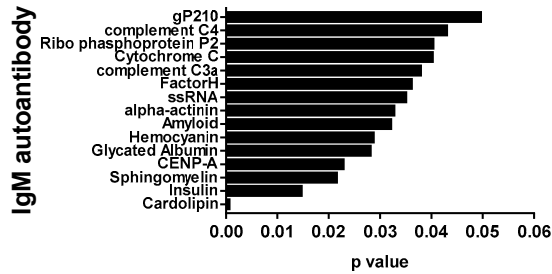

**B**

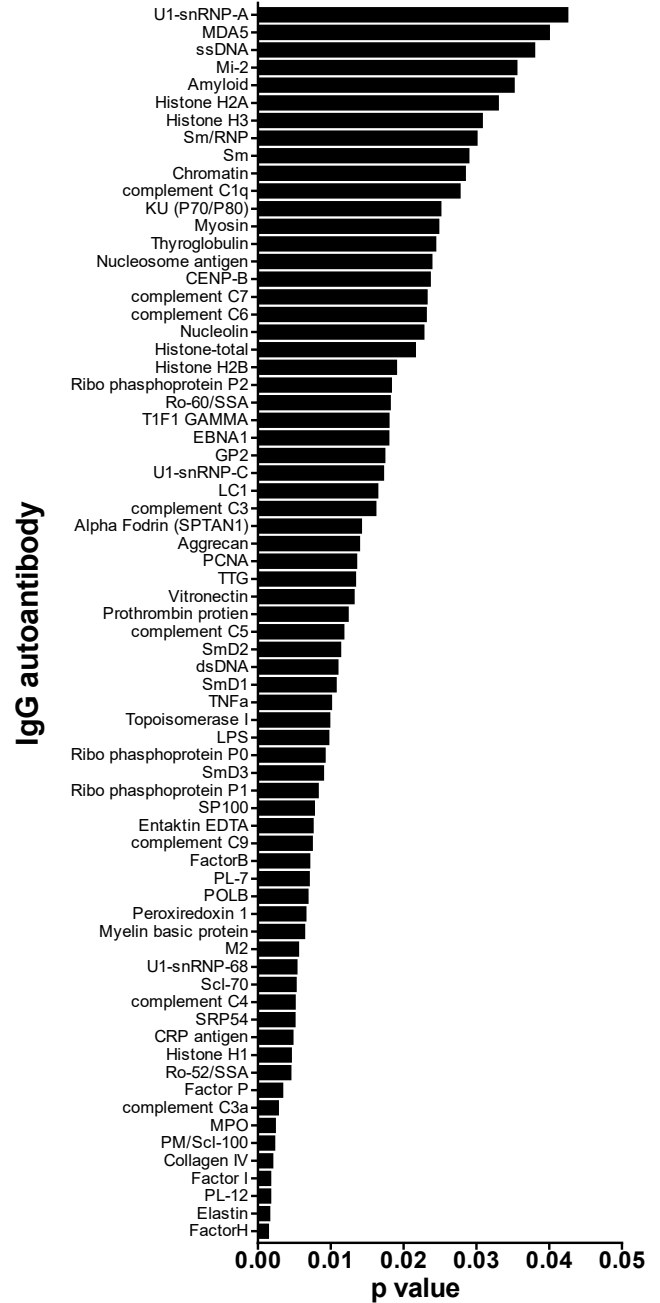

4

5

6

7

**Supplementary figure S3.** The graphs show the p-values in the multiple t-test comparisons of IgM (A) or IgG (B) autoantibodies in primary DENV-infected individuals compared with those in secondary DENV-infected individuals.

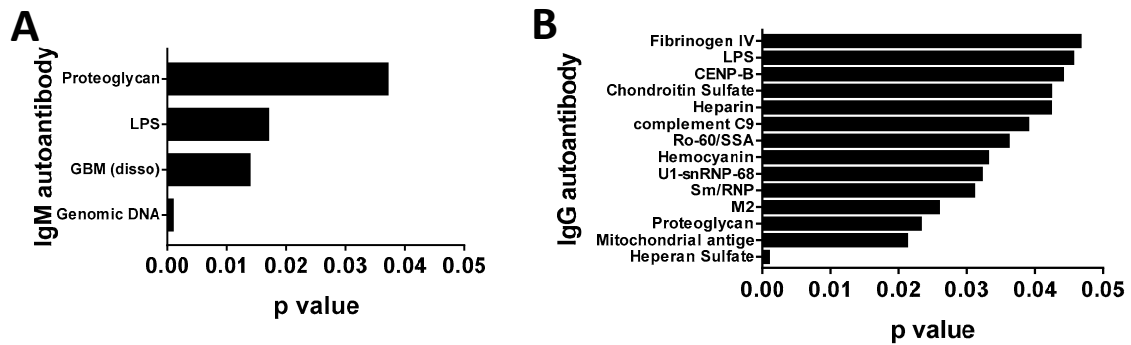

**Supplementary figure S4.** The graphs show the p-values from multiple t-test comparisons of IgM (A) or IgG (B) autoantibodies in ASD compared with those in DF/DHF patients.

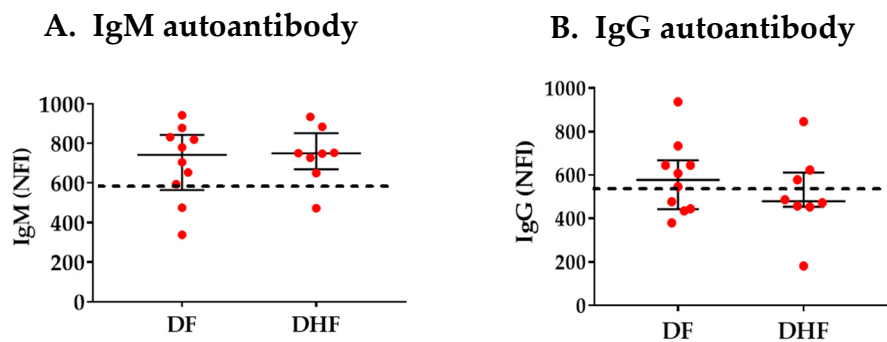

**Supplementary figure S5.** Autoantibody expression in DF and DHF patients with secondary DENV infection. (A, B) Each dot represents the sum of NFI signals of IgM autoantibodies or IgG autoantibodies in each individual. The dashed lines indicate the baseline of the median NFI in HD group. Statistical analysis was done using two-tailed Mann Whitney tests to compare the two groups. Median and interquartile ranges are shown. DF=10, DHF=8.
